# Supplementary material for: Synthesis, structure and magnetic properties of phenylhydroxamate-based coordination clusters
Source: Royal Society of Chemistry journal article supplement (doi:10.1039/c4dt02405b), 2014-01-01
Supplement: c4dt02405b1.pdf [file c4dt02405b1.pdf]

## Electronic Supplementary Information

Synthesis, structure and magnetic properties of phenylhydroxamate-based coordination clusters.

Remi Tirfoin<sup>1</sup>, Lise-Marie Chamoreau<sup>1,3</sup>, Yanling Li<sup>1,2</sup>, Benoit Fleury<sup>1</sup>, Laurent Lisnard<sup>1,2</sup>, Yves Jourmaux\*<sup>1,2</sup>.

Figure S1: powder diffraction pattern measured for **4** and calculated for **3**.

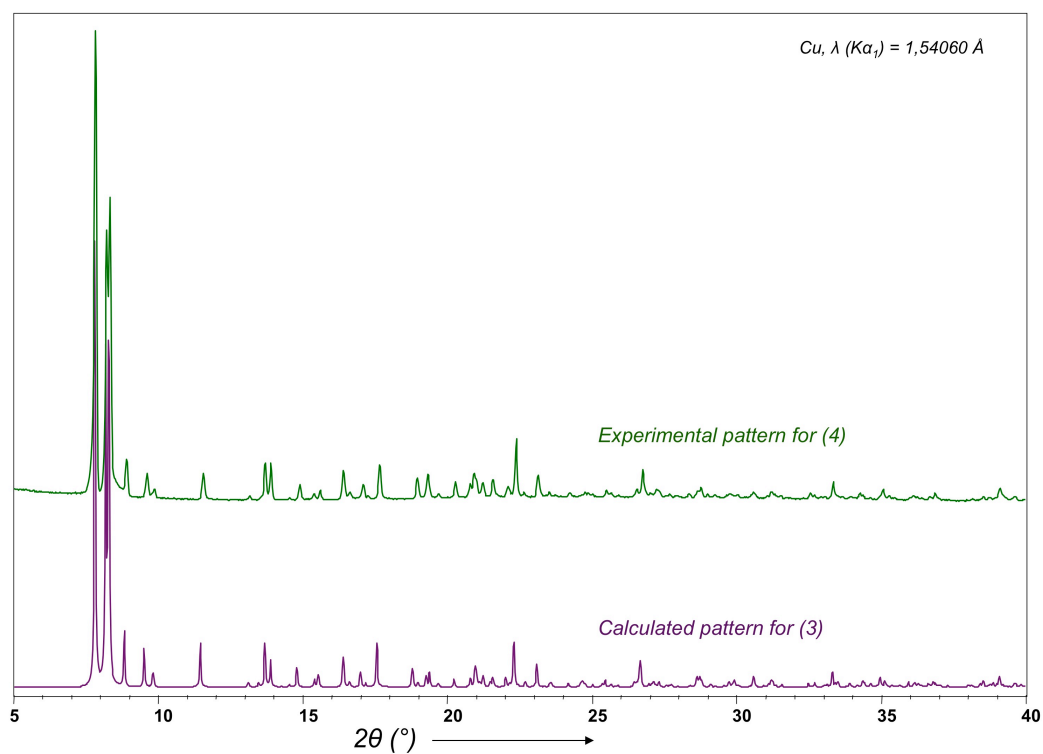

Figure S2: intermolecular interactions in the crystal packing of **3** with orange dotted lines highlighting the H bonds. <sup>t</sup>Bu groups and non-water hydrogen atoms have been removed for clarity.

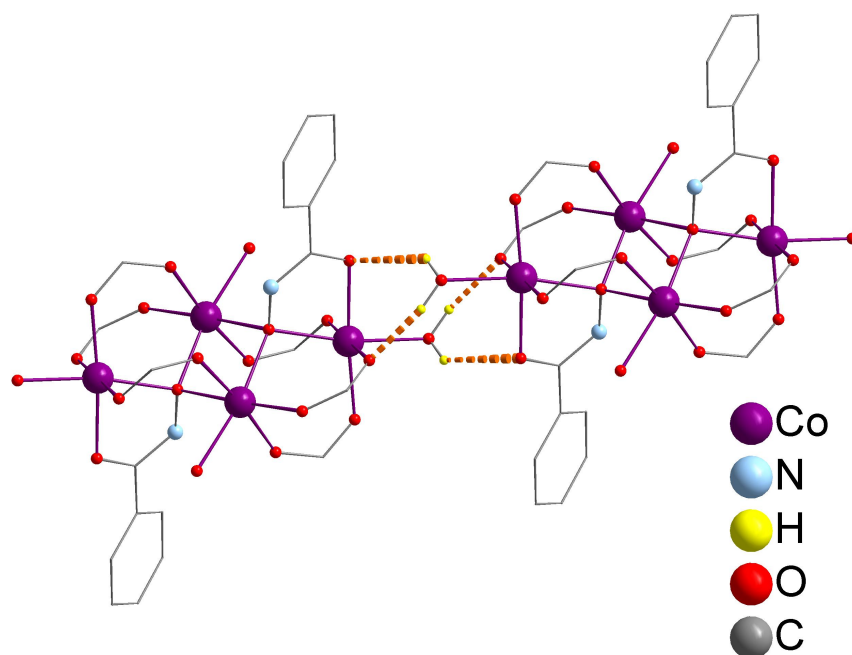

Figure S3:  $\chi_M$  vs.  $T$  and  $1/\chi_M$  vs.  $T$  plots measured at 1 kOe for **1**. The solid black lines are the best-fit curves.

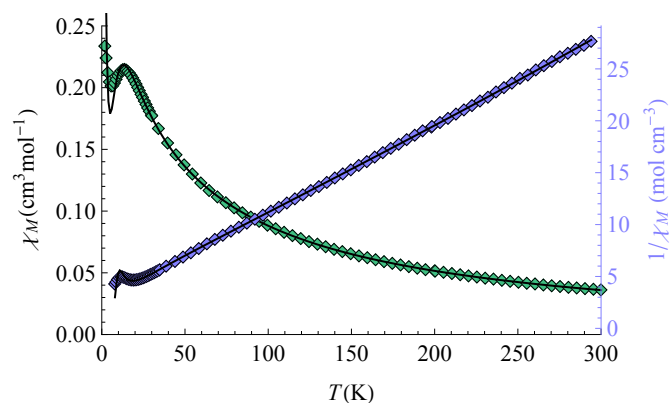

Figure S4:  $\chi_M$  vs.  $T$  and  $1/\chi_M$  vs.  $T$  plots measured at 1 kOe for **2**. The solid black lines are the best-fit curves.

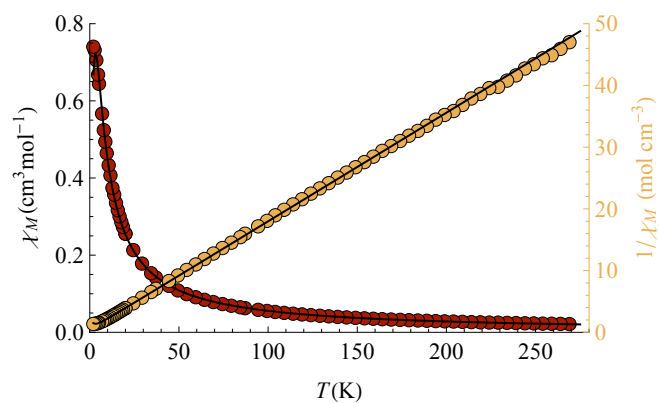

Figure S5:  $\chi_M$  vs.  $T$  and  $1/\chi_M$  vs.  $T$  plots measured at 1 kOe for **3**. The solid black lines are the best-fit curves.

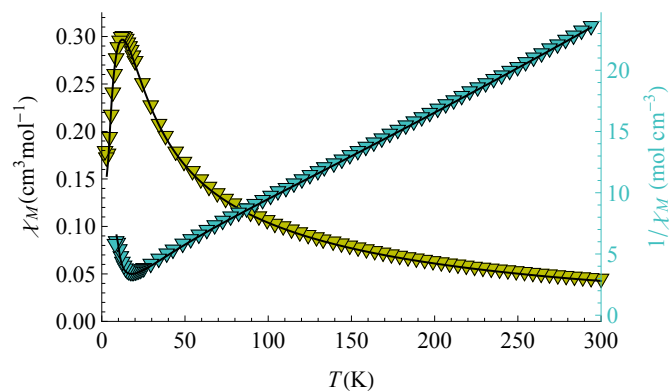

Figure S6:  $\chi_M$  vs.  $T$  and  $1/\chi_M$  vs.  $T$  plots measured at 1 kOe for **4**. The solid black lines are the best-fit curves.

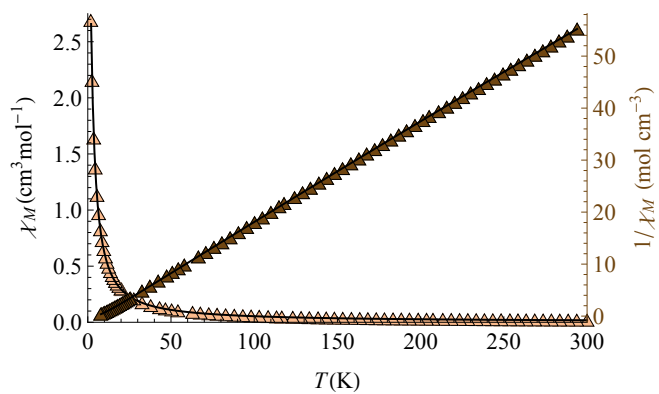

Figure S7:  $\chi_M$  vs.  $T$  and  $1/\chi_M$  vs.  $T$  plots measured at 1 kOe for **5**. The solid black lines are the best-fit curves.

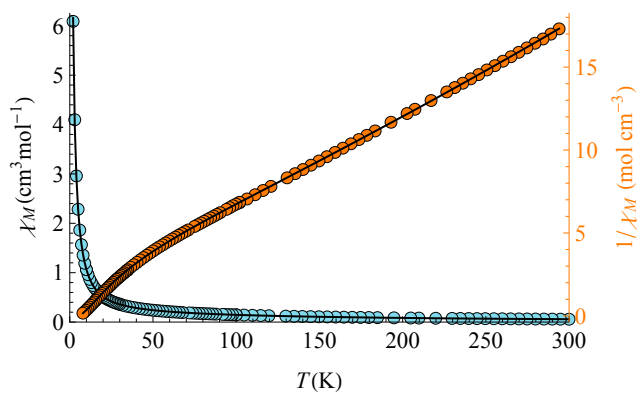

## Model used to fit the magnetic data of 1, 3 and 5

To model the magnetic properties of 1, 3 and 5, the  $\chi_M T$  product is expressed as :

$$\chi_M T = \mathbf{F}[\mathbf{G}_i(T, J_{ij}), \lambda, \alpha, \Delta, T, J_{ij}]$$

where  $\mathbf{F}$  is the thermal variation of  $\chi_M T$  calculated for a polynuclear system with the same topology than that of 1, 3 and 5 but with a fictitious  $S^{\text{eff}}=1/2$  to mimic the ground state Kramer doublet of a Co(II) ion. In order to obtain identical matrix elements in the ground state Kramer's doublet with fictitious  $S^{\text{eff}}=1/2$  it is necessary to use a 5/3 scaling factor ( $S \Rightarrow 5/3 S_{\text{eff}}$ ). For the butterfly complexes 1 and 3, it is possible to derive an analytical law for  $\mathbf{F}$  using the Van-Vleck formula.

$$\chi_M T = \left( T \left[ \frac{2 \beta^2 g_{\text{bod}}^2 e^{\frac{25 j_{\text{wb}}}{36 k T}}}{k T} - \frac{12 \beta^2 (g_{\text{bod}} - g_w)^2 e^{\frac{25 j_{\text{wb}} - 50 j_{\text{bb}}}{36 k T}}}{25 j_{\text{bb}}} + \frac{9 \beta^2 (g_{\text{bod}} - g_w)^2 e^{\frac{25 j_{\text{wb}} - 25 j_{\text{bb}}}{36 k T}}}{25 j_{\text{bb}}} + \frac{3 \beta^2 (g_{\text{bod}} - g_w)^2 e^{\frac{25 j_{\text{bb}} + 25 j_{\text{wb}}}{9 k T}}}{25 j_{\text{bb}}} + \frac{2 \beta^2 (g_{\text{bod}} + g_w)^2 e^{\frac{25 j_{\text{bb}} + 25 j_{\text{wb}}}{9 k T}}}{k T} + 2 e^{\frac{25 j_{\text{wb}} - 25 j_{\text{bb}}}{36 k T}} \left( \frac{\beta^2 (g_{\text{bod}} + g_w)^2}{4 k T} - \frac{9 \beta^2 (g_{\text{bod}} - g_w)^2}{100 j_{\text{bb}}} \right) + 2 e^{\frac{25 j_{\text{bb}} + 25 j_{\text{wb}}}{9 k T}} \left( \frac{9 \beta^2 (g_{\text{bod}} - g_w)^2}{100 j_{\text{bb}}} + \frac{\beta^2 (g_{\text{bod}} + g_w)^2}{4 k T} \right) + \frac{2 \beta^2 g_w^2 e^{-\frac{25 j_{\text{wb}}}{12 k T}}}{k T} \right] \right) / \left( e^{\frac{25 j_{\text{wb}} - 50 j_{\text{bb}}}{36 k T}} + 3 e^{\frac{25 j_{\text{wb}} - 25 j_{\text{bb}}}{36 k T}} + 5 e^{\frac{25 j_{\text{bb}} + 25 j_{\text{wb}}}{9 k T}} + 4 e^{-\frac{25 j_{\text{wb}}}{12 k T}} + 3 e^{\frac{25 j_{\text{wb}}}{36 k T}} \right)$$

Where  $j_{\text{bb}}$  and  $j_{\text{wb}}$  are the body-body and wing-body interaction respectively and  $g_{\text{bod}}$  and  $g_w$  the Landé factors of the body and wing ions respectively. The other parameters have their usual meaning.

For 5 the numerical value of  $\mathbf{F}$  is obtained by full diagonalisation of the hamiltonian matrix established using the following hamiltonian :

$$\mathcal{H}_{\text{tot}} = \mathcal{H}_{\text{int}} + \mathcal{H}_{\text{Ze}} \quad \text{with:}$$

$$\begin{aligned} \mathcal{H}_{\text{int}} &= -\frac{25}{9} J_{12} (S_{\text{Co1a}}^{\text{eff}} S_{\text{Co2}}^{\text{eff}} + S_{\text{Co1b}}^{\text{eff}} S_{\text{Co2}}^{\text{eff}}) - \frac{25}{9} J_{13} (S_{\text{Co1a}}^{\text{eff}} S_{\text{Co3a}}^{\text{eff}} + S_{\text{Co1b}}^{\text{eff}} S_{\text{Co3b}}^{\text{eff}}) \\ &- \frac{25}{9} J_{14} (S_{\text{Co1a}}^{\text{eff}} S_{\text{Co4}}^{\text{eff}} + S_{\text{Co1b}}^{\text{eff}} S_{\text{Co4}}^{\text{eff}}) - \frac{25}{9} J_{23} (S_{\text{Co2}}^{\text{eff}} S_{\text{Co3a}}^{\text{eff}} + S_{\text{Co2}}^{\text{eff}} S_{\text{Co3b}}^{\text{eff}}) - \frac{25}{9} J_{24} S_{\text{Co2}}^{\text{eff}} S_{\text{Co4}}^{\text{eff}} \\ \mathcal{H}_{\text{Ze}} &= \sum_{i=1}^6 G_{\text{Coi}}(T, J_{ij}) \beta S_{\text{Coi}} H \end{aligned}$$

The influence of spin-orbit interaction on each cobalt ion is introduced through a fictitious Landé factor  $\mathbf{G}_i$  calculated from the following relation: [F. Lloret et al., *Inorg. Chim. Acta*, 2008, **361**, 3432]

$$G_i(T, J_{ij}) = g(T) + f(J, T)$$

$$\text{with } f(J, T) = \frac{n}{2} \frac{100J(\alpha+2)}{81\alpha\lambda} P_0 \quad \text{and} \quad P_0 = \frac{\text{Exp}[-4\alpha\lambda/k.T]}{3 + \text{Exp}[-5\alpha\lambda/2k.T] + \text{Exp}[-4\alpha\lambda/k.T]}$$

$g(T)$  is calculated using the Curie law for  $S=1/2$  :

$$(\chi_M T)_{Co} = \frac{N\beta^2 g(T)^2 S(S+1)}{3k} \quad \text{with } S = \frac{1}{2}$$

$$\text{that is } g(T)^2 = \frac{4k}{N\beta^2} (\chi_M T)_{Co}$$

$(\chi_M T)_{Co}$  is an average value obtained with

$$(\chi_M T)_{Co} = \frac{(\chi_{Mz} T)_{Co} + 2(\chi_{Mx} T)_{Co}}{3}$$

$(\chi_{Mx} T)_{Co}$  and  $(\chi_{Mz} T)_{Co}$  are calculated by full diagonalisation of the hamiltonian matrix established from the following hamiltonian using the  $T \leftrightarrow P$  isomorphism: [Lines, M. E. *J. Chem. Phys.* 1971, **55**, 2977-2984].

$$\mathcal{H}_v^{SO} = -\frac{3}{2}\alpha\lambda L.S + \Delta \left( L_z^2 - \frac{1}{3}L^2 \right) + \left( -\frac{3\alpha}{2}L_v + g_e S_v \right) \quad \text{with } v = x, z$$

where  $\lambda$  the spin-orbit coupling constant,  $\alpha$  the orbital reduction factor,  $\Delta$  the axial distortion parameter and  $g_e$  is the giromagnetic ratio of a free electron.

In our case for each Co(II) ions there are different exchange interaction pathways corresponding to different  $J$  values Therefore to calculate  $f(J, T)$  we used an averaged  $J_{i,average}$  values for each cobalt ions according to :

$$J_{i,average} = \sum_j J_{ij} / n \quad \text{where } n \text{ is equal to the number of } J_{ij} \text{ pathways}$$

For **1** and **3** the two different  $g$  factors are the following:

$$g_{\text{body}} = -\frac{50 e^{-\frac{4\alpha\lambda}{kT}} (2 + \alpha) (J_{bb} + 2 J_{wb})}{81 \left( 3 + e^{-\frac{4\alpha\lambda}{kT}} + 2 e^{-\frac{5\alpha\lambda}{2kT}} \right) \alpha \lambda} + 2 \sqrt{\frac{k (2 (\chi_{Mx} \cdot T)_{Co} + (\chi_{Mz} \cdot T)_{Co})}{3 N\beta^2}}$$

$$g_{\text{wing}} = -\frac{100 e^{-\frac{4\alpha\lambda}{kT}} (2 + \alpha) J_{wb}}{81 \left( 3 + e^{-\frac{4\alpha\lambda}{kT}} + 2 e^{-\frac{5\alpha\lambda}{2kT}} \right) \alpha \lambda} + 2 \sqrt{\frac{k (2 (\chi_{Mx} \cdot T)_{Co} + (\chi_{Mz} \cdot T)_{Co})}{3 N\beta^2}}$$

where  $J_{bb}$  and  $J_{wb}$  are the body-body and wing-body coupling constants respectively.

For **5** there are four different Co(II) ions:

$$g_{Co1} = -\frac{50 e^{-\frac{4\alpha\lambda}{kT}} (j_{12} + j_{13} + j_{14}) (2 + \alpha)}{81 \left( 3 + e^{-\frac{4\alpha\lambda}{kT}} + 2 e^{-\frac{5\alpha\lambda}{2kT}} \right) \alpha \lambda} + 2 \sqrt{\frac{k (2 (\chi_{Mx} \cdot T)_{Co} + (\chi_{Mz} \cdot T)_{Co})}{3 N \beta^2}}$$

$$g_{Co2} = -\frac{50 e^{-\frac{4\alpha\lambda}{kT}} (2 j_{12} + 2 j_{23} + j_{24}) (2 + \alpha)}{81 \left( 3 + e^{-\frac{4\alpha\lambda}{kT}} + 2 e^{-\frac{5\alpha\lambda}{2kT}} \right) \alpha \lambda} + 2 \sqrt{\frac{k (2 (\chi_{Mx} \cdot T)_{Co} + (\chi_{Mz} \cdot T)_{Co})}{3 N \beta^2}}$$

$$g_{Co3} = -\frac{50 e^{-\frac{4\alpha\lambda}{kT}} (j_{13} + j_{23}) (2 + \alpha)}{81 \left( 3 + e^{-\frac{4\alpha\lambda}{kT}} + 2 e^{-\frac{5\alpha\lambda}{2kT}} \right) \alpha \lambda} + 2 \sqrt{\frac{k (2 (\chi_{Mx} \cdot T)_{Co} + (\chi_{Mz} \cdot T)_{Co})}{3 N \beta^2}}$$

$$g_{Co4} = -\frac{50 e^{-\frac{4\alpha\lambda}{kT}} (2 j_{14} + j_{24}) (2 + \alpha)}{81 \left( 3 + e^{-\frac{4\alpha\lambda}{kT}} + 2 e^{-\frac{5\alpha\lambda}{2kT}} \right) \alpha \lambda} + 2 \sqrt{\frac{k (2 (\chi_{Mx} \cdot T)_{Co} + (\chi_{Mz} \cdot T)_{Co})}{3 N \beta^2}}$$

where  $j_{ij}$  are the coupling constant between the  $Co_i$  and  $Co_j$  ions, the other symbols have the same meaning than in the previous formula.

Table S1: BVS calculations for compounds (1), (3) and (5).<sup>1</sup>

| (1)         |                           |                            |
|-------------|---------------------------|----------------------------|
| Atom labels | BVS calculated for Co(II) | BVS calculated for Co(III) |
| Co(1)       | 2,0114                    | 2,0554                     |
| Co(2)       | 2,0426                    | 2,0872                     |
| (3)         |                           |                            |
| Atom labels | BVS calculated for Co(II) | BVS calculated for Co(III) |
| Co(1)       | 2,0343                    | 2,0787                     |
| Co(2)       | 2,0487                    | 2,0935                     |
| (5)         |                           |                            |
| Atom labels | BVS calculated for Co(II) | BVS calculated for Co(III) |
| Co(1)       | 2,0708                    | 2,1161                     |
| Co(2)       | 1,9927                    | 2,0363                     |
| Co(3)       | 2,0040                    | 2,0478                     |
| Co(4)       | 1,9672                    | 2,0102                     |

<sup>1</sup> a) I. D. Brown, D. Altermatt, *Acta Crystallogr.* 1985, **B41**, 244, b) N. E. Brese, M. O'Keeffe, *Acta Crystallogr.* 1991, **B47**, 192, c) M. O'Keeffe, N. E. Brese, *Acta Crystallogr.* 1992, **B48**, 152.
